# Supplementary material for: Does Childhood Obesity Trigger Neuroinflammation?
Source: MDPI journal article supplement (doi:10.3390/biomedicines10081953), 2022-08-11
Supplement: s1 [file s1]

**Table S1.** Statistical scores for each sample in AT-Ctrl or AT-OB.

|                                         | <b>CTR1</b>         | <b>CTR2</b>         | <b>noCTR1</b>       | <b>noCTR2</b>       | <b>noCTR3</b>       |
|-----------------------------------------|---------------------|---------------------|---------------------|---------------------|---------------------|
| <b>Number of input reads</b>            | 4729009             | 4845249             | 3630402             | 3854851             | 7110689             |
| <b>Average read length</b>              | 294bp               | 343bp               | 307bp               | 298bp               | 289bp               |
| <b>Uniquely mapped reads number (%)</b> | 3944291<br>(84.41%) | 4212336<br>(86.94%) | 2917407<br>(80.36%) | 3018185<br>(78.30%) | 5412256<br>(76.11%) |
| <b>Average depth</b>                    | 1.77196             | 1.92041             | 1.34209             | 1.57603             | 7.18229             |

Table shows the information about number of input reads, average read length, uniquely mapped reads number and average depth for each sample. CTR1 and CTR2 are the control samples (AT-Ctrl) while noCTR1, noCTR2 and noCTR3 are the obese samples (AT-OB).
