# Supplementary material for: Does Childhood Obesity Trigger Neuroinflammation?
Source: MDPI journal article supplement (doi:10.3390/biomedicines10081953), 2022-08-11
Supplement: s1 [file s1]

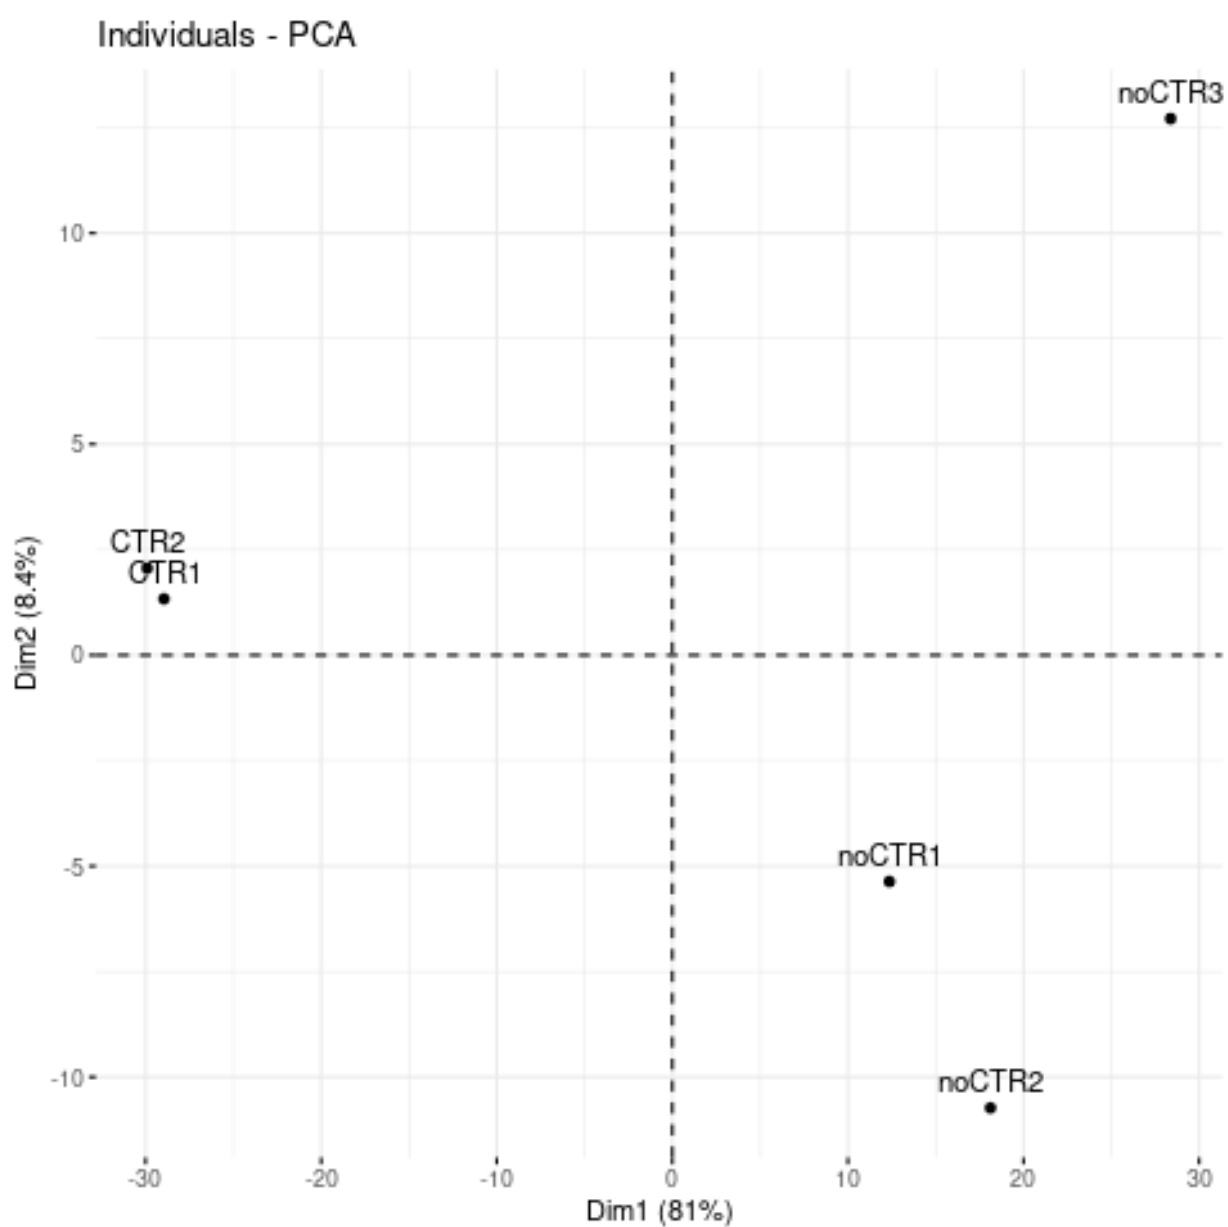

**Figure S1.** PCA with AT-Ctrl samples (CTR1, CTR2) and AT-OB samples (noCTR1, noCTR2, noCTR3). In X axis is reported the dimension that define the 81% of variance and in Y axis is reported the dimension that define 8.4% of variance among samples. Dim1 is quite able to discriminate AT-Ctrl and AT-OB.
